# Supplementary material for: High Specificity of BCL11B and GLG1 for EWSR1-FLI1 and EWSR1-ERG Positive Ewing Sarcoma
Source: MDPI journal article supplement (doi:10.3390/cancers12030644), 2020-03-10
Supplement: s1 [file s1]

# Supplementary Figure S1 Orth *et al.*

a

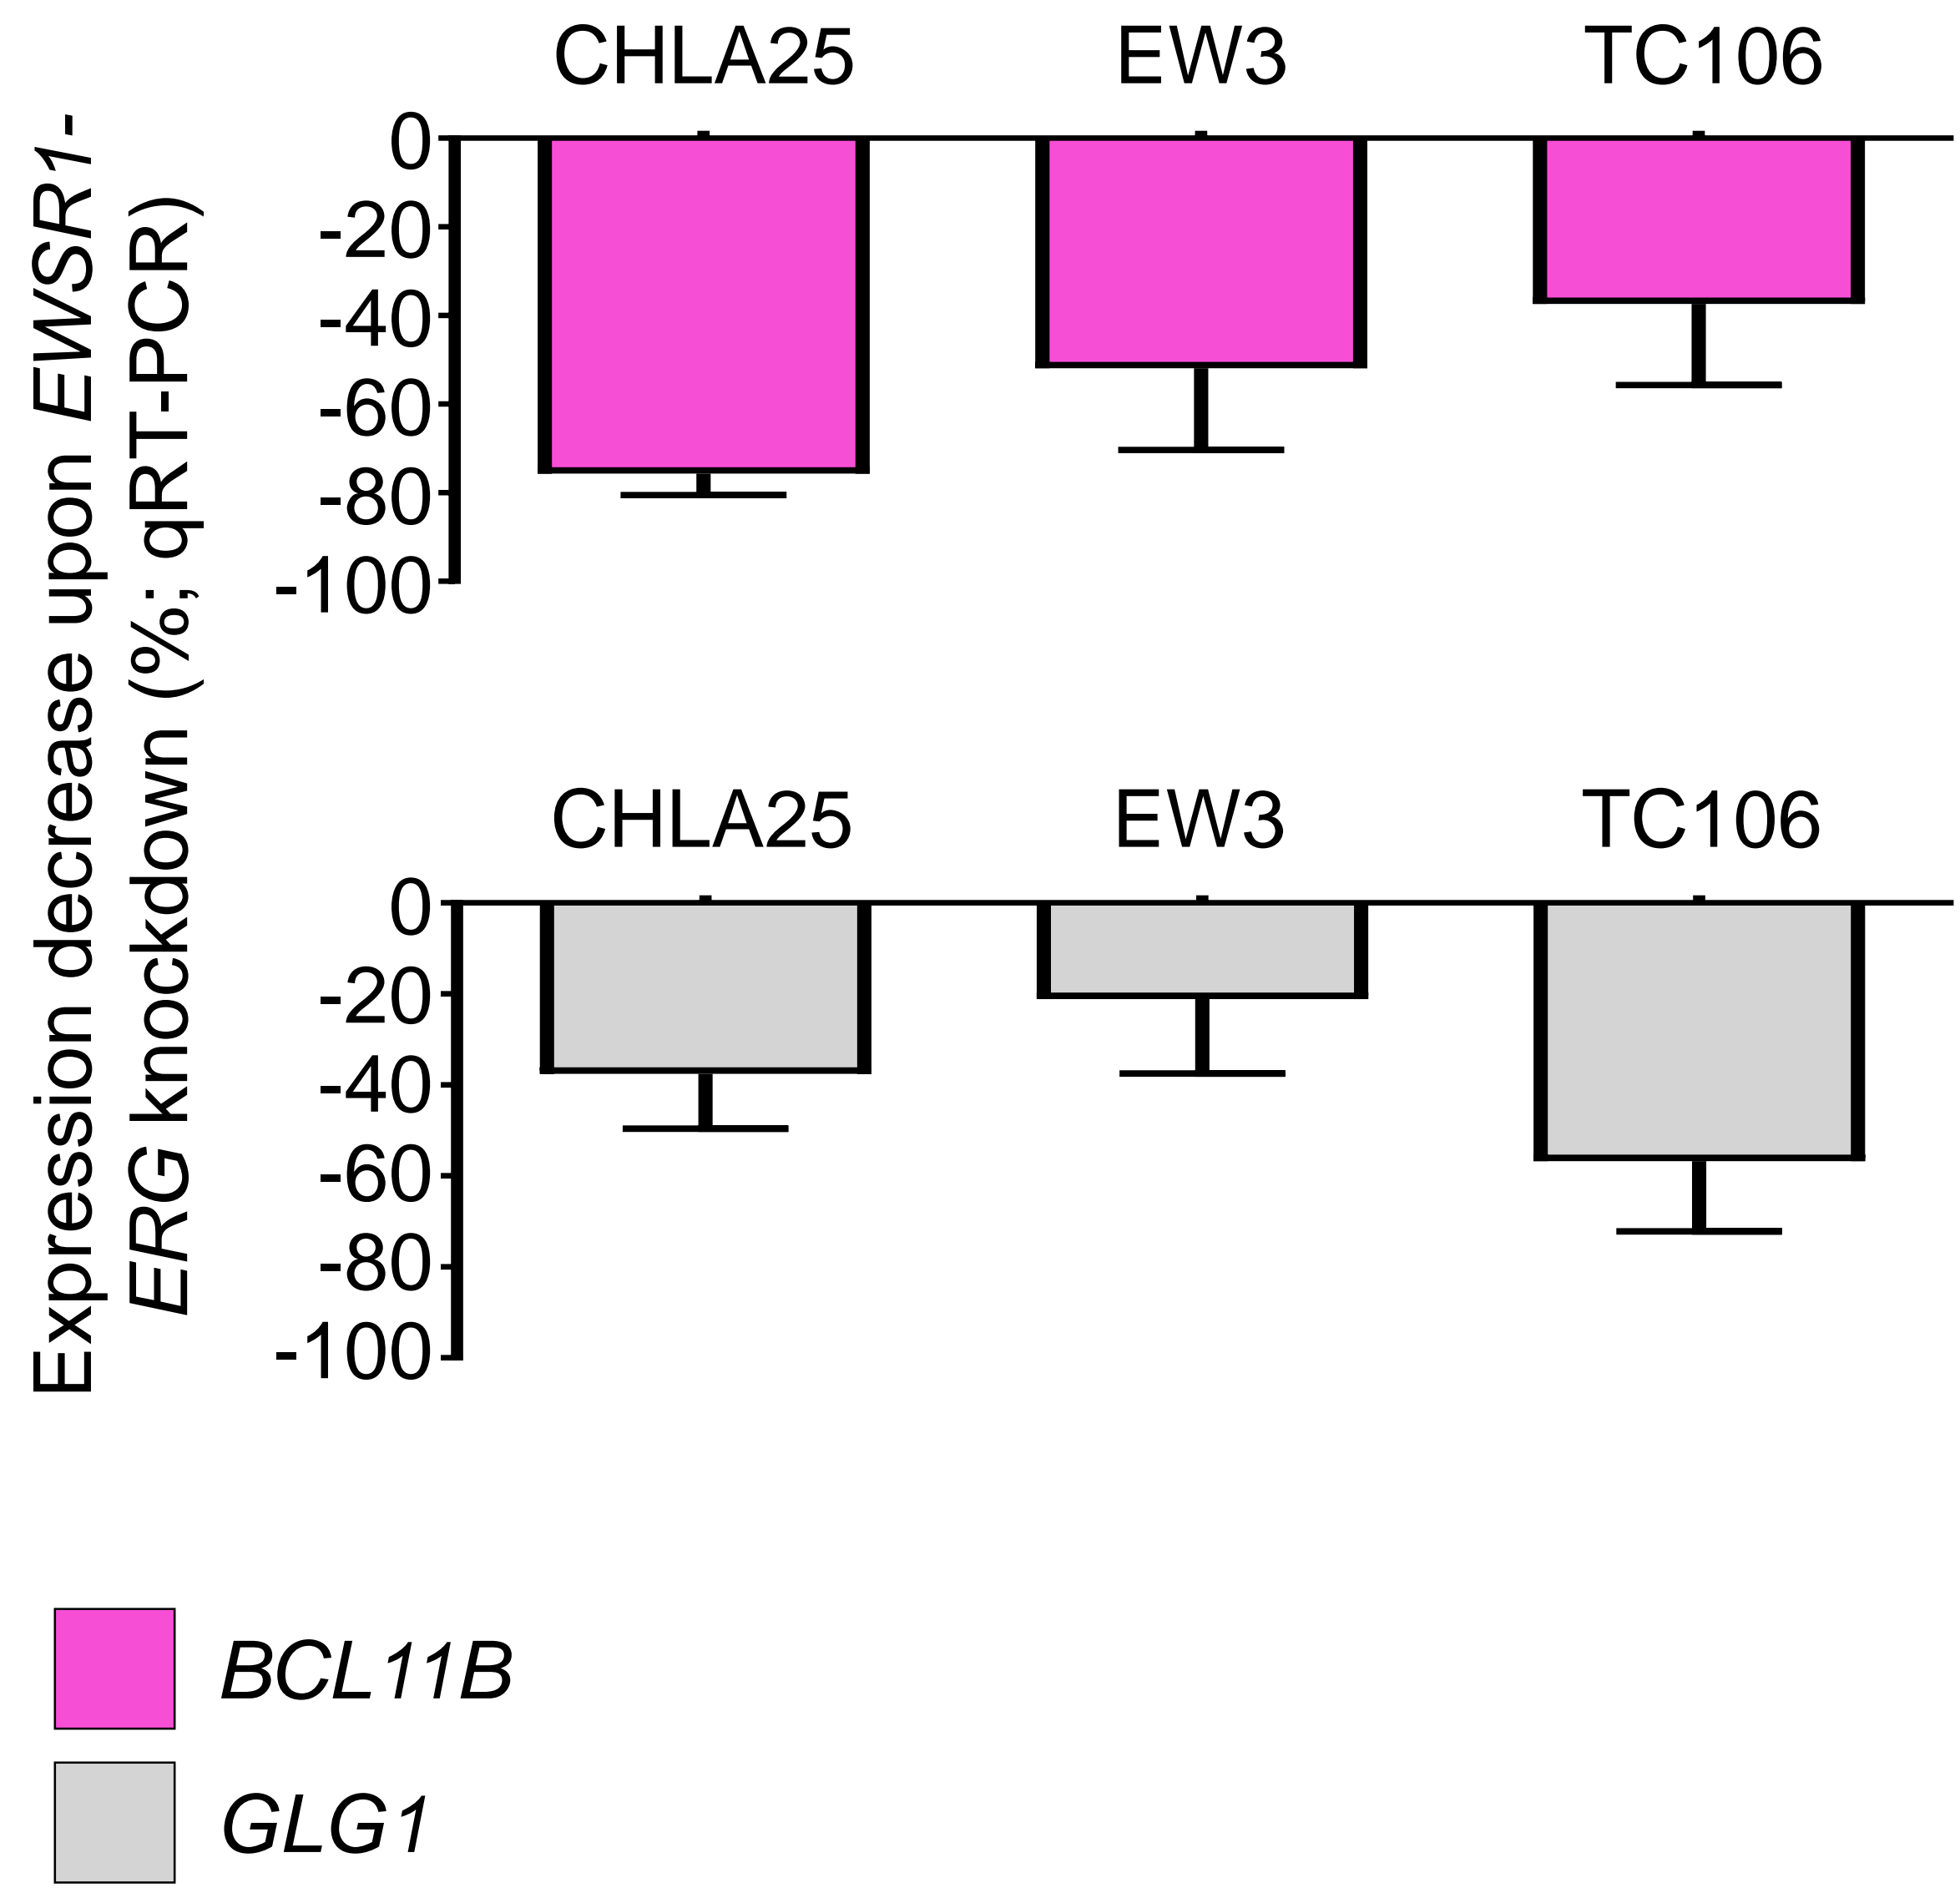

b

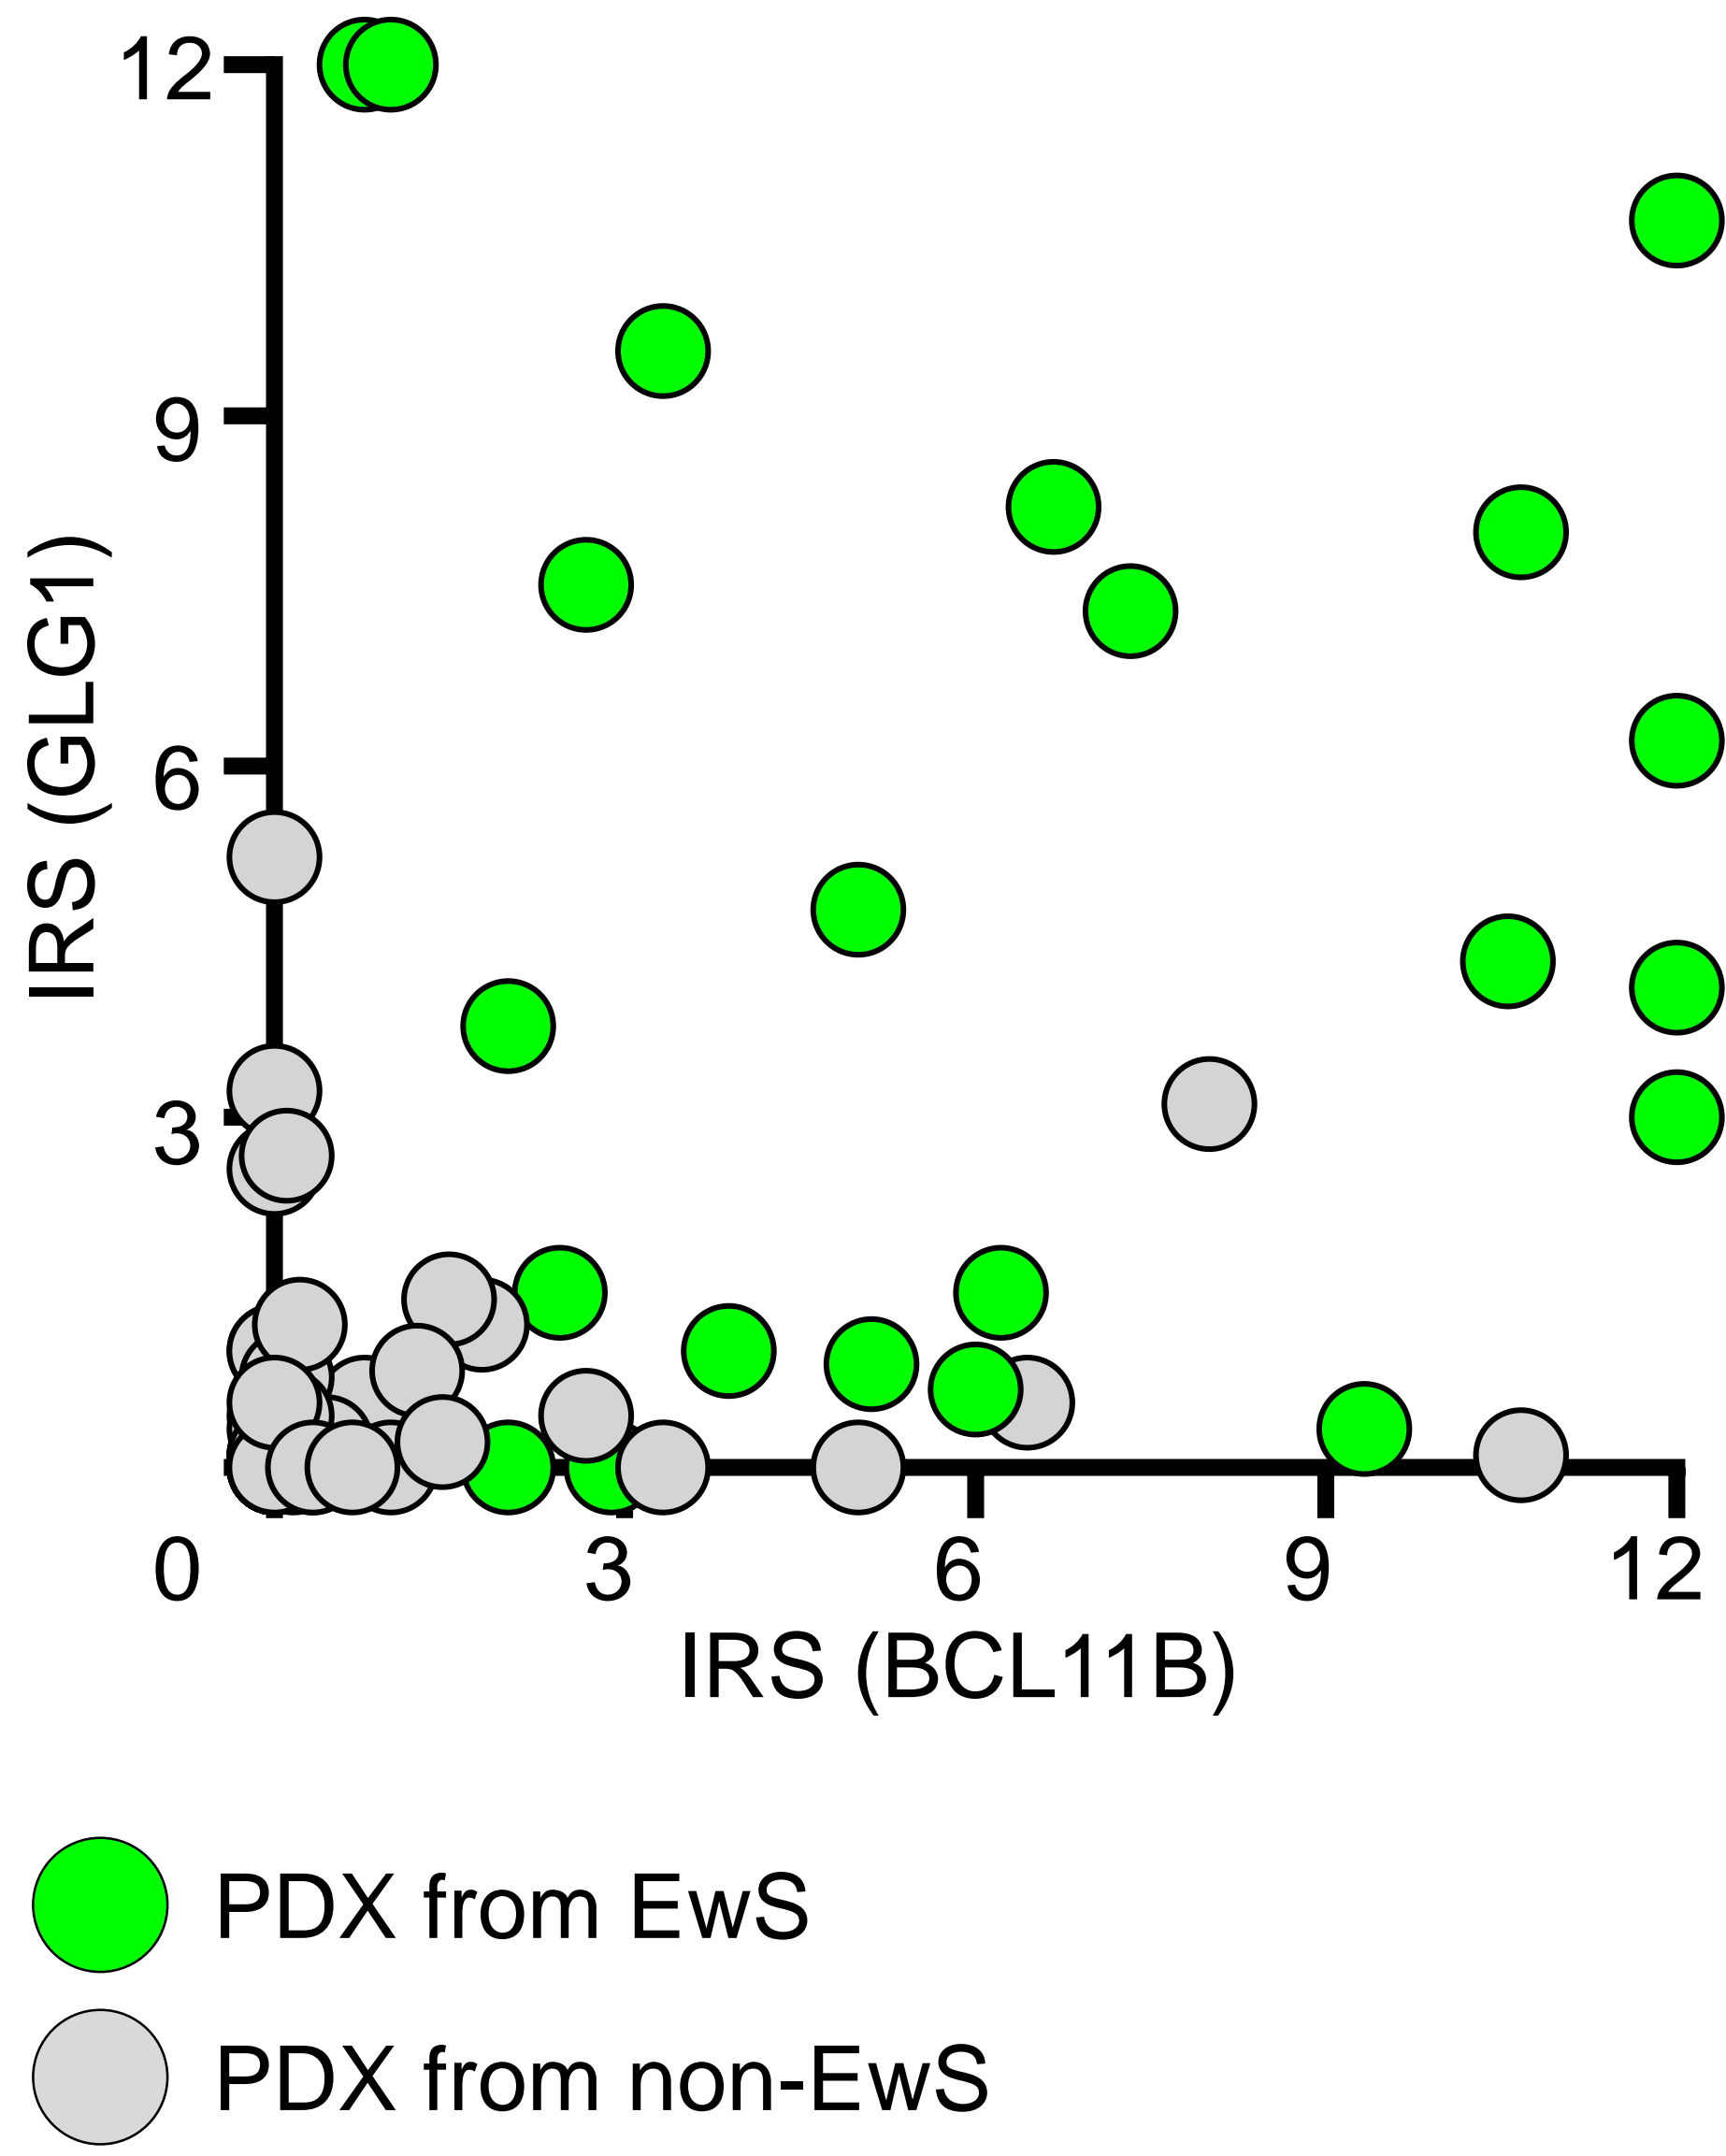

**Supplementary Figure S1: *EWSR-ERG* knockdown leads to decrease of *BCL11B* and *GLG1* expression in EwS cell line models and PDX EwS models exhibit high immunoreactivity for BCL11B and GLG1.** (a) Bar plots indicating expression decrease of *BCL11B* (pink) and *GLG1* (grey) upon knockdown of the fusion oncogene in three *EWSR1-ERG* positive EwS cell lines, qRT-PCR results of *n*=3 experiments, error bars indicate standard deviation. (b) Diagram indicating BCL11B and GLG1 immunoreactivity for PDX from EwS (green) and other pediatric sarcomas (grey).
