# Supplementary material for: High Specificity of BCL11B and GLG1 for EWSR1-FLI1 and EWSR1-ERG Positive Ewing Sarcoma
Source: MDPI journal article supplement (doi:10.3390/cancers12030644), 2020-03-10
Supplement: s1 [file s1]

## Supplementary Figure S2 Orth *et al.*

Percentage of samples with consistent classification in high/low expression accross both cores

consistent inconsistent

Marker combination  
for EwS diagnosis

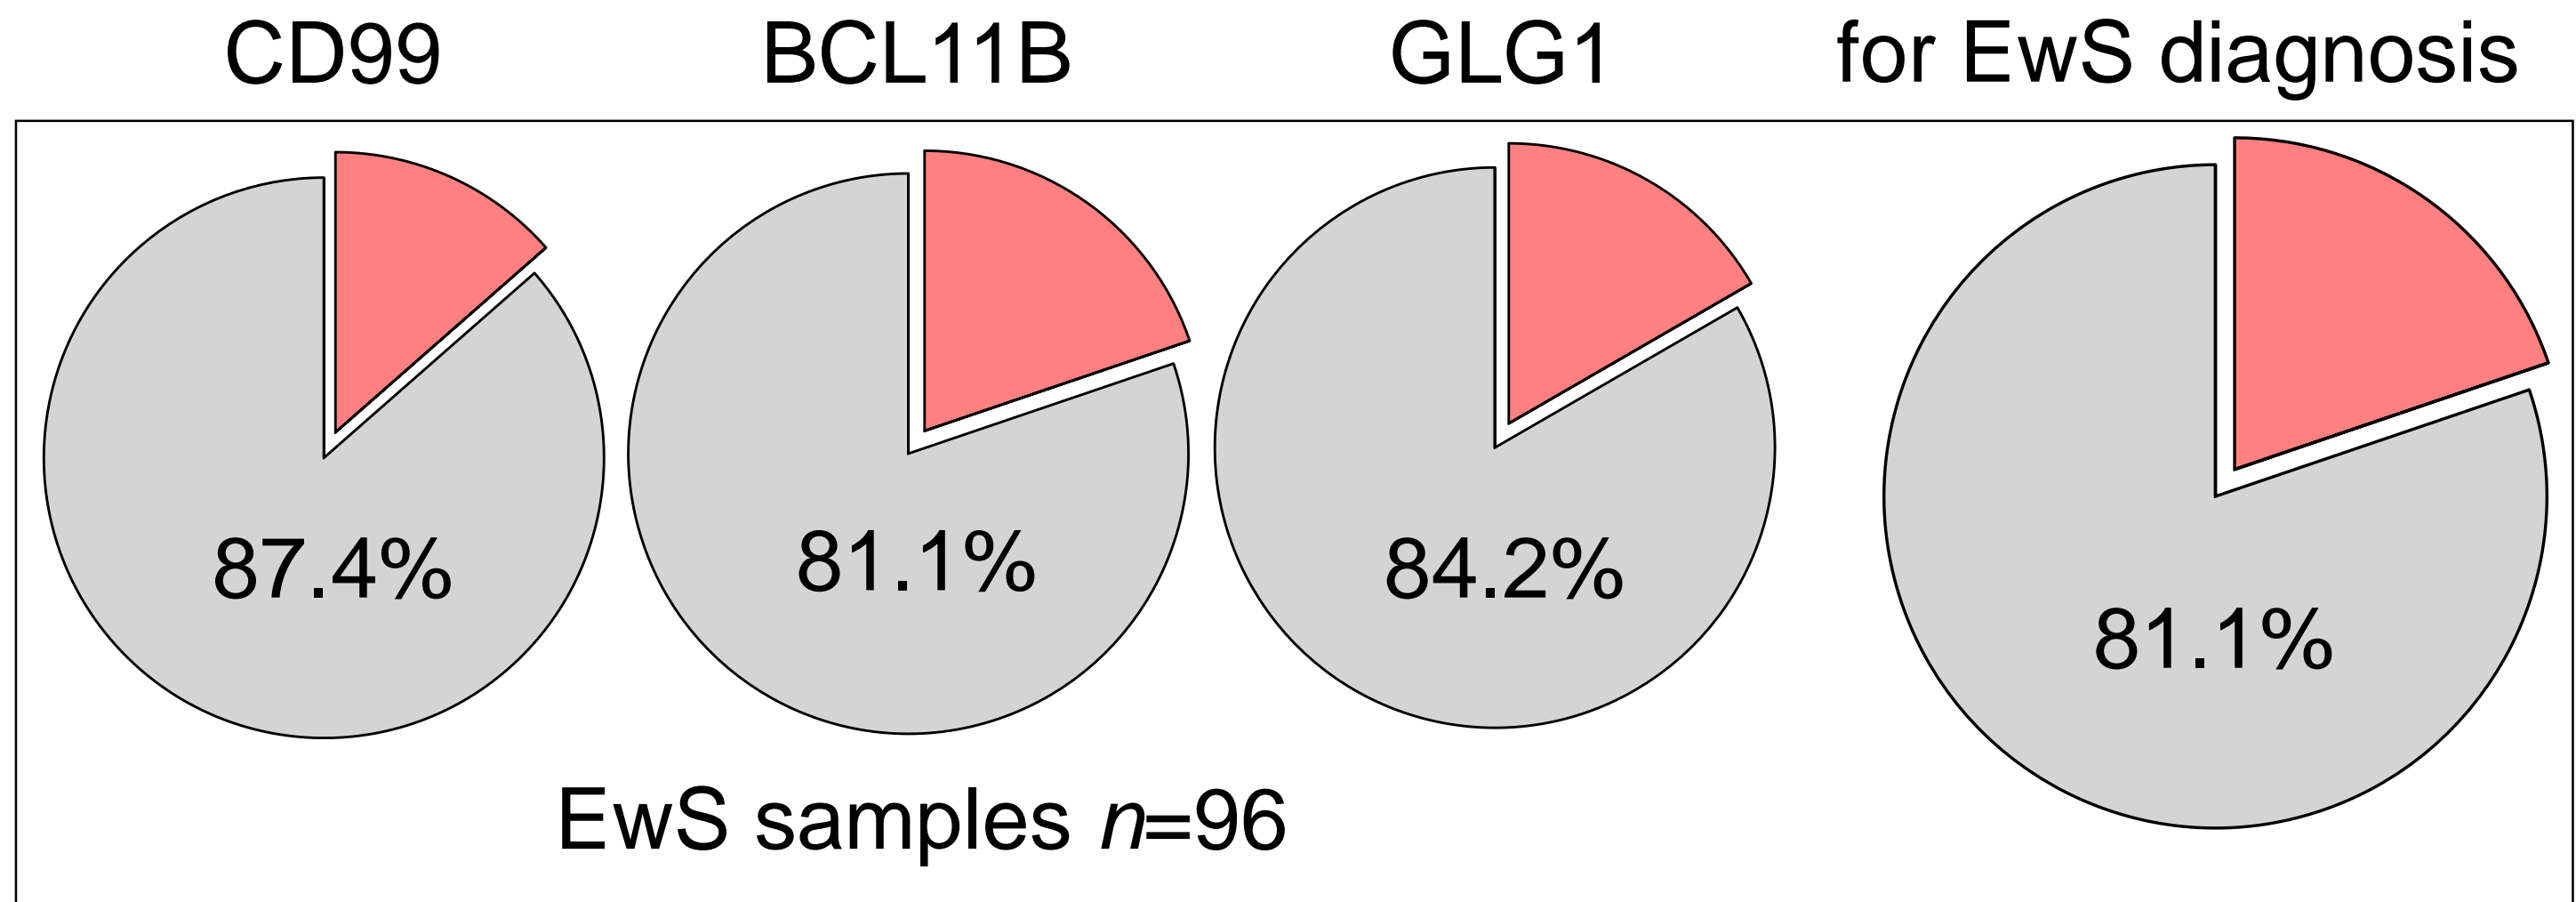

**Supplementary Figure S2: BCL11B and GLG1 show moderate intra-tumoral staining heterogeneity in EwS.** Pie charts indicating EwS samples with two cores evaluated in each staining ( $n=96$ ) that were classified as high or low expressing the respective marker consistently (grey) or inconsistently (light red) across both cores.
